# Supplementary material for: Detection of SARS-CoV-2 in saliva by a low-cost LSPR-based sensor
Source: Royal Society of Chemistry journal article supplement (doi:10.1039/d3ay00853c), 2023-01-01
Supplement: d3ay00853c1.pdf [file d3ay00853c1.pdf]

# Supporting Information for

## “Detection of SARS-CoV-2 in Saliva by a Low-cost LSPR-based Sensor”

Ariadne Tuckmantel Bido<sup>1</sup>, Katie Ember<sup>2,3</sup>, Dominique Trudel<sup>2,3</sup>, Madeleine Duran<sup>5</sup>, Frederic

Leblond<sup>2,3</sup>, Alexandre G. Brolo<sup>1,4\*</sup>

*(1) Department of Chemistry, University of Victoria, Victoria, BC V8P 5C2, Canada*

*(2) Polytechnique Montréal, Department of Engineering Physics, Montreal, QC H3C 3A7, Canada*

*(3) Centre de recherche du Centre Hospitalier de l'Université de Montréal, Division of Neurology, Montreal, QC H3C 3J7, Canada*

*(4) Center for Advanced Materials and Related Technologies (CAMTEC), University of Victoria, Victoria, BC, V8W 2Y2, Canada*

*(5) Internal Medicine service of the Centre Hospitalier de l'Université de Montréal (CHUM) and CHUM Research center*

\* *Email: [agbrolo@uvic.ca](mailto:agbrolo@uvic.ca)*

*Phone: 1 250 721 7167*

## TABLE OF CONTENTS

Page S3 – Figure S1. Photo of the sensing films on a well plate

Page S3 – Figure S2. Layers of the sensor.

Page S4 – Figure S3. Assay with saliva spiked with SARS-CoV-2 (2019-nCoV) Spike S1 + S2 ECD-His Recombinant Protein for protocol development.

Page S4 – Figure S4. Example of one well monitoring for the layering of the sensor elements and the tested saliva.

Page S5 – Figure S5. AgNP solution, and the formed AgNP film measured in deionized water.

Page S6 – Figure S6. LSPR  $\lambda_{\max}$  correlation with refractive index for the Ag film for RIS determination.

Page S7 – Table S1. Thresholds, TPR and FRP for ROC construction for the sensor with Spike S2 Ab as detection element.

Page S8 – Table S2. Thresholds, TPR and FRP for ROC construction for the sensor with S1+S2 protein as detection element.

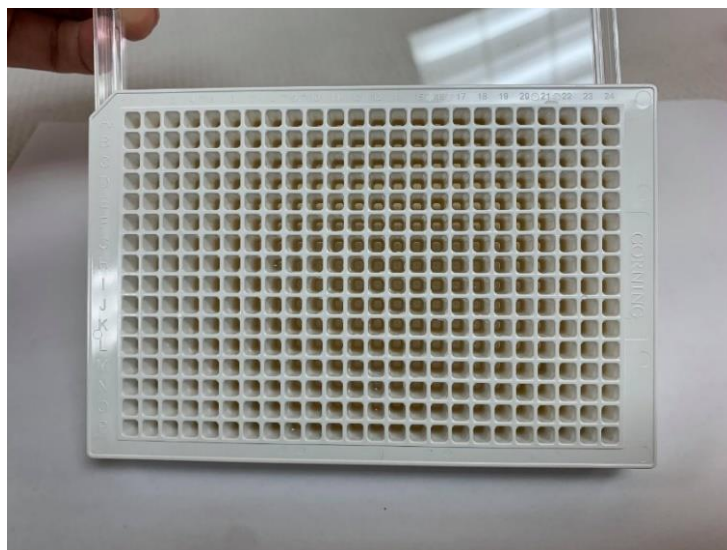

Figure S1. Photo of the sensing films (AgNPs) covering a well plate. Each plate has 364 individual wells for testing.

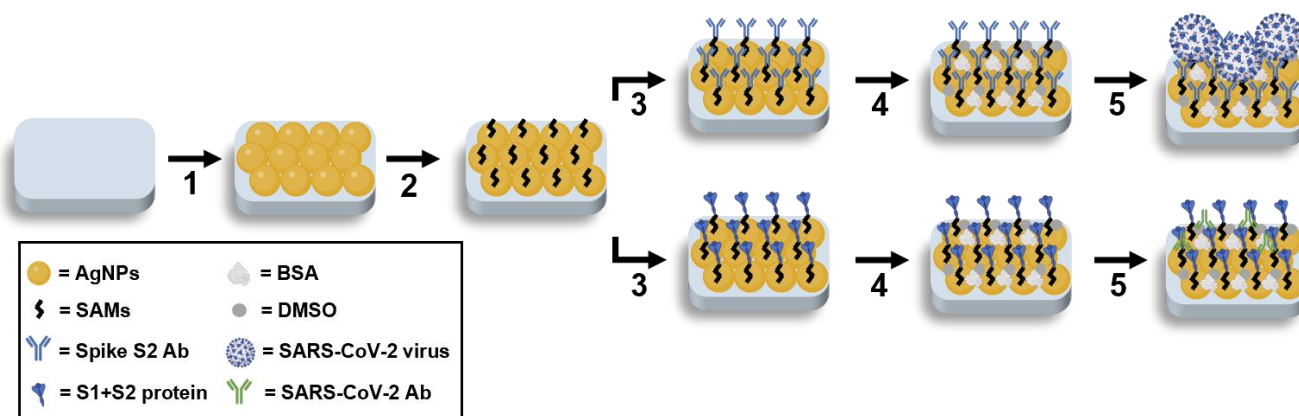

Figure S2. Layers constructed on the well plates. (1) AgNP film, (2) SAMS, (3) Spike S2 Ab or S1+S2 protein, (4) blocking with BSA and DMSO and (5) detection of the SARS-CoV-2 virus or SARS-CoV-2 Ab in saliva.

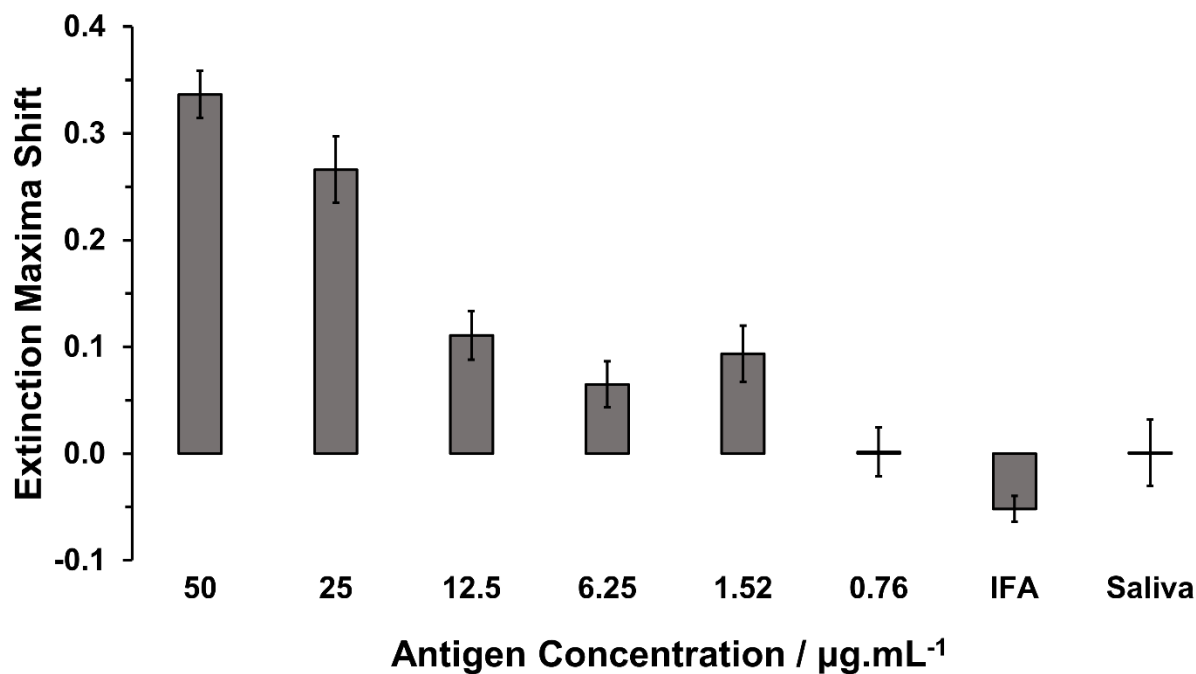

Figure S3. Assay conducted in saliva spiked with SARS-CoV-2 (2019-nCoV) Spike S1 + S2 ECD-His Recombinant Protein, with a control, IFA (Influenza A H7N9 (A/Shanghai/1/2013) Hemagglutinin / HA Protein (His Tag) and only saliva background. The detection element used in the AgNP film was Spike S2 Ab.

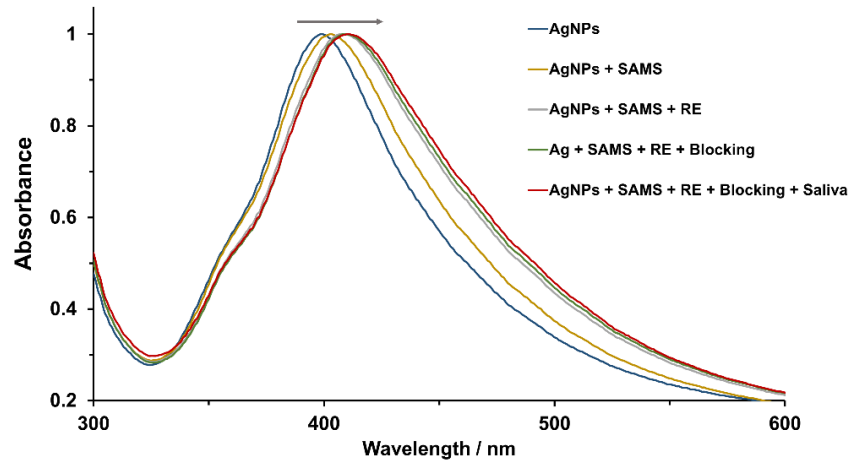

Figure S4. A shift of one well monitored and tested with a patient's saliva. Layers are AgNPs, SAMs, recognition element (RE) in this case SARS-CoV-2 (2019-nCoV) Spike S2 Antibody, blocking and saliva from the patient.

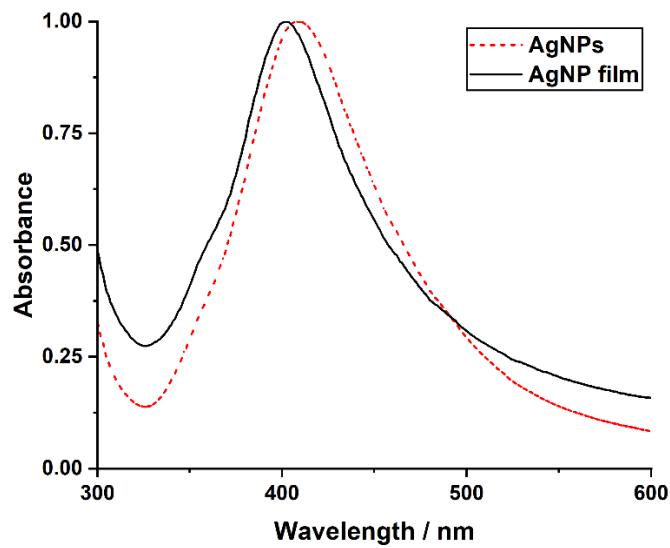

Figure S5. AgNP solution, and the formed AgNP film measured in deionized water.

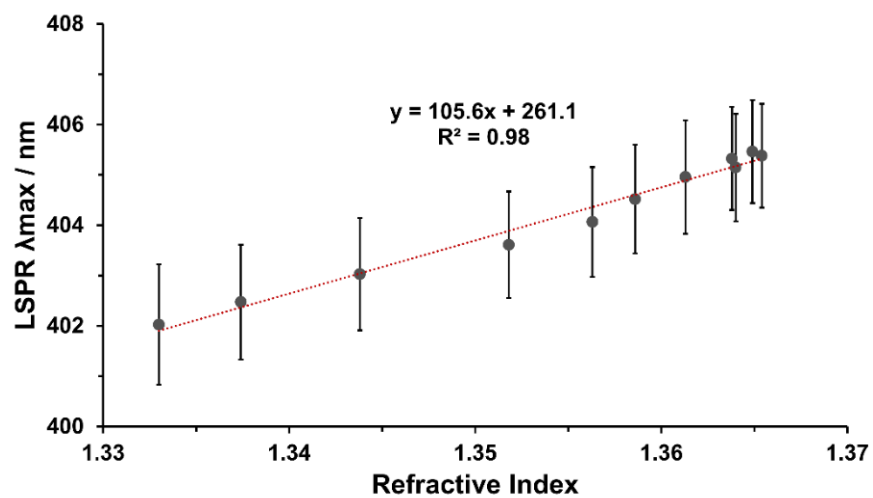

Figure S6. LSPR  $\lambda_{\text{max}}$  correlation with refractive index for the Ag film in which the assay is based. The refractive index sensitivity (RIS) is 105.6 nm/RIU as denoted in the slope of the calibration curve.

To construct the ROC curves, confusion matrices were done for each possible threshold of the observed shift difference with actual and predicted “infected” and “not infected” as classifiers and determining the TRP and FRP.

Table S1. Thresholds, true positive rate (TPR) and false positive rate (FRP) calculated for the 15 confusion matrices used for the construction of the ROC curve for the sensor with Spike S2 Ab as detection element.

| Virus Detection |      |      |
|-----------------|------|------|
| Threshold       | TPR  | FRP  |
| >-0.30          | 1.00 | 1.00 |
| >-0.20          | 0.89 | 1.00 |
| >-0.13          | 0.78 | 1.00 |
| >-0.03          | 0.56 | 1.00 |
| >-0.01          | 0.44 | 1.00 |
| >0.10           | 0.33 | 1.00 |
| >0.13           | 0.11 | 1.00 |
| >0.30           | 0.11 | 0.88 |
| >0.50           | 0.11 | 0.75 |
| >0.60           | 0.00 | 0.75 |
| >0.69           | 0.00 | 0.63 |
| >0.75           | 0.00 | 0.50 |
| >0.82           | 0.00 | 0.38 |
| >0.83           | 0.00 | 0.25 |
| >1.05           | 0.00 | 0.13 |
| >1.56           | 0.00 | 0.00 |

Table 2. Thresholds, true positive rate (TPR) and false positive rate (FRP) calculated for the 19 confusion matrices used for the construction of the ROC curve for the sensor with S1+S2 protein as detection element.

| Antibody Detection |      |      |
|--------------------|------|------|
| Threshold          | TPR  | FPR  |
| >-0.88             | 1.00 | 1.00 |
| >-0.85             | 1.00 | 0.89 |
| >-0.84             | 1.00 | 0.78 |
| >-0.67             | 1.00 | 0.67 |
| >-0.63             | 1.00 | 0.56 |
| >-0.55             | 1.00 | 0.44 |
| >-0.44             | 1.00 | 0.33 |
| >-0.37             | 1.00 | 0.22 |
| >-0.36             | 1.00 | 0.22 |
| >-0.34             | 1.00 | 0.22 |
| >-0.27             | 1.00 | 0.11 |
| >-0.01             | 0.75 | 0.11 |
| >0.20              | 0.63 | 0.11 |
| >0.60              | 0.63 | 0.00 |
| >0.80              | 0.50 | 0.00 |
| >0.90              | 0.25 | 0.00 |
| >0.93              | 0.25 | 0.00 |
| >1.13              | 0.13 | 0.00 |
| >1.30              | 0.00 | 0.00 |
